# Supplementary material for: Adalimumab Reduces Extraintestinal Manifestations in Patients with Crohn’s Disease: A Pooled Analysis of 11 Clinical Studies
Source: Springer Nature journal article supplement (doi:10.1007/s12325-018-0678-0), 2018-03-07

## SUPPLEMENTAL MATERIALS

**Supplemental Table S1. Number and Proportion of Patients With EIMs at Baseline in Induction/Maintenance Studies or Open-Label Extensions Included in Pooled Analysis\***

| <b>Study</b>                                                             | <b>Placebo<br/>n/N (%)</b> | <b>Adalimumab<br/>n/N (%)</b> |
|--------------------------------------------------------------------------|----------------------------|-------------------------------|
| CLASSIC-I (NCT00055523)[13]/<br>CLASSIC-II (NCT00055497)[11]             | 48/73 (66)                 | 157/225 (70)                  |
| GAIN (NCT00105300)[15]/<br>ADHERE (NCT00195715)[21] <sup>†</sup>         | 109/166 (66)               | 101/158 (64)                  |
| M04-729 Japan (NCT00445939)/<br>M06-837 (NCT00445432)[19,41]             | 8/23 (35)                  | 17/67 (25)                    |
| CHARM (NCT00077779)[12]/<br>ADHERE (NCT00195715)[20] <sup>†</sup>        | 106/259 (41)               | 296/517 (57)                  |
| EXTEND (NCT00348283)[17]                                                 | 26/65 (40)                 | 43/64 (67)                    |
| IMaGINE 1 (NCT00409682)[14]/<br>IMaGINE 2 (NCT00686374)[22] <sup>‡</sup> | NA                         | 37/121 (31)                   |
| CARE (NCT00409617)[18]                                                   | NA                         | 486/942 (52)                  |
| Patients with EIMs/total patients (n/N)                                  | 297/586 (51)               | 1137/2094 (54)                |

EIM, extraintestinal manifestation; NA, not applicable.

\*Intent-to-treat populations.

<sup>†</sup>Patients from GAIN and CHARM could enroll in ADHERE.

<sup>‡</sup>The EIM analysis only included patients  $\geq 13$  years of age with Crohn's Disease Activity Index data.

IMaGINE 2 is ongoing.

n/N: patients with EIMs at baseline/total intent-to-treat population.

**Supplemental Figure S1.** Patient disposition from adalimumab studies included in this analysis. Patient numbers at baseline were from the intent-to-treat population; patient numbers from the 6-month (weeks 20–26) and 1-year (weeks 52–56) time points were from patients remaining at follow-up. The dashed lines represent the end of the induction studies and the beginning of the maintenance or extension studies. ADA, adalimumab; DB, double blind; OL, open label; PBO, placebo.

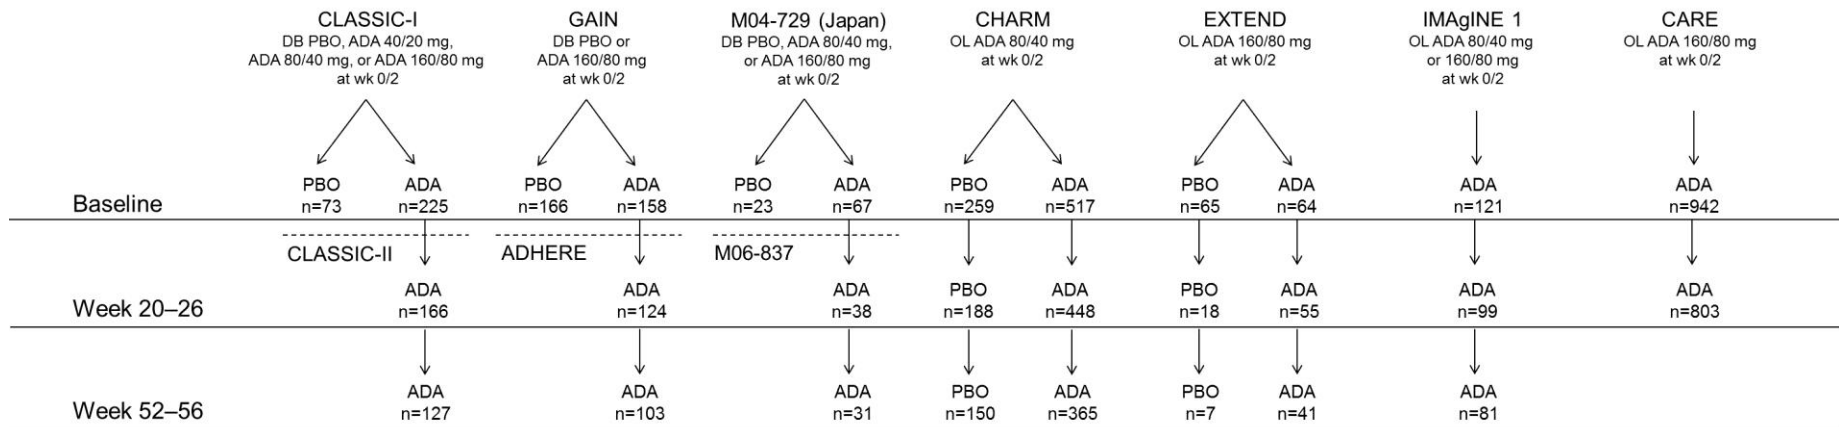

Supplement: MOESM1 [file 15516638]
